# Supplementary material
Source: publisher figshare collection journal article supplement (https://sage.figshare.com/ndownloader/files/19146911)
Supplement: Supplementary file 1 [file 19146911]

**Supplementary Fig. 6.** Subgroup analyses by response to prior triptan therapy (good or insufficient) for headache pain-freedom, MBS-freedom, headache pain relief, disability freedom, and PGIC rating of very much/much better 2 hours post-first dose with lasmiditan versus placebo in the triptan 2+ user subpopulation (lasmiditan doses combined due to small patient numbers)

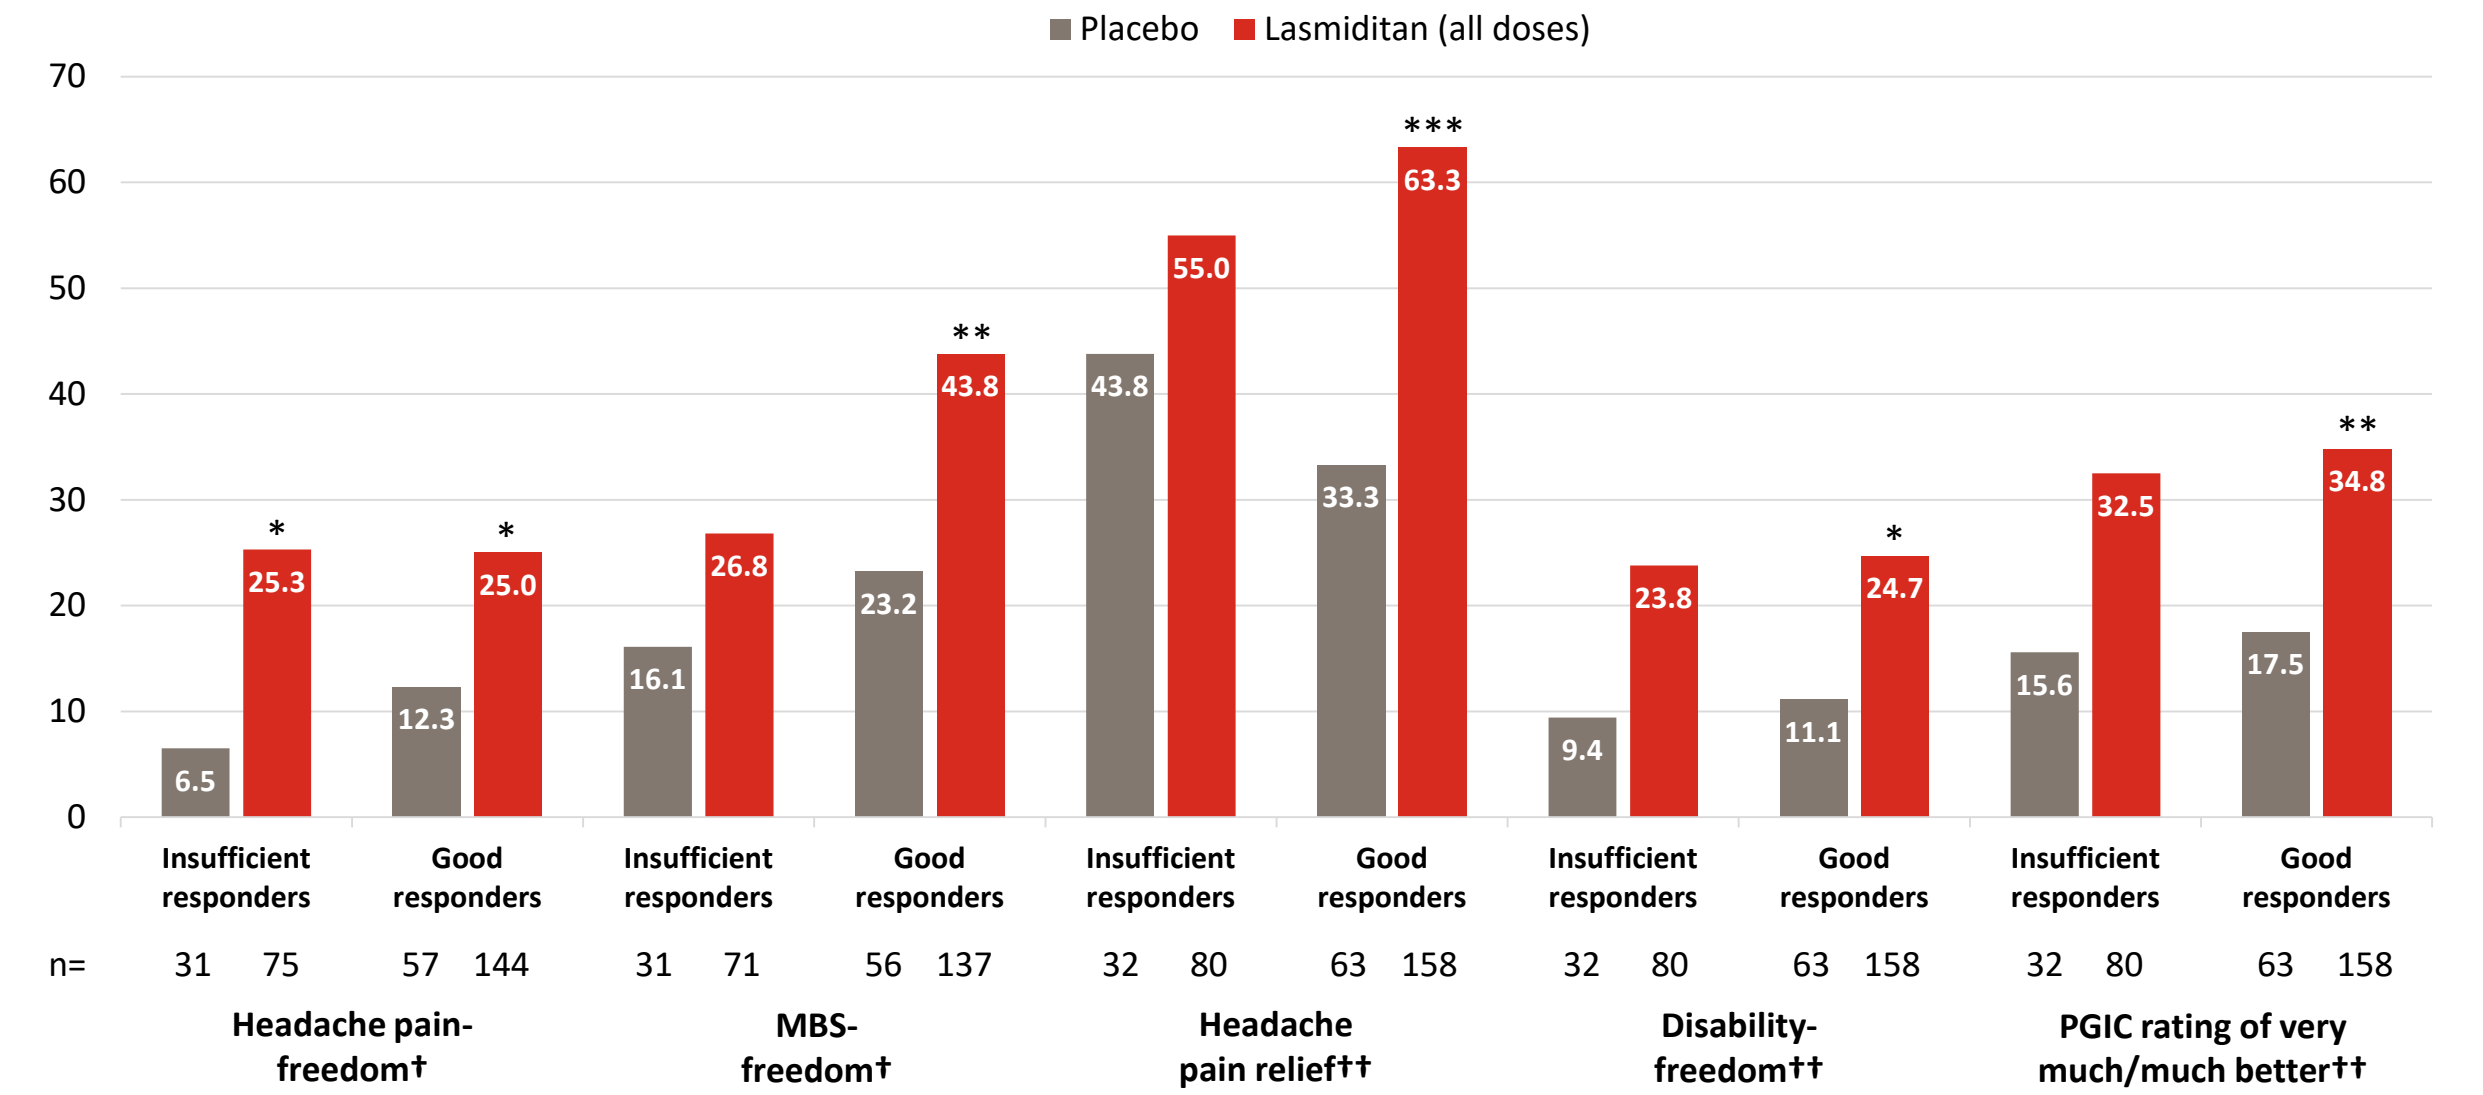

\*P<0.05 vs. placebo; \*\*P<0.01 vs. placebo, \*\*\*P<0.001 vs. placebo  
†Assessed in the modified intention-to-treat (ITT) population  
††Assessed in the ITT population  
MBS, most bothersome symptom; PGIC, Patient Global Impression of Change
